# Supplementary material for: Odontogenic ameloblast-associated (ODAM) is inactivated in toothless/enamelless placental mammals and toothed whales
Source: BMC Evol Biol. 2019 Jan 23;19:31. doi: 10.1186/s12862-019-1359-6 (PMC6343362; doi:10.1186/s12862-019-1359-6)
Supplement: Supplementary file 2 — Tables S2. Genes identified in a screen for genes that are preferentially lost in enamelless or edentulous mammals. (XLSX 13.5 kb) [file 12862_2019_1359_MOESM2_ESM.xlsx]

## Sheet: ForwardGenomics screen
Table S2: Genes identified in a screen for genes that are preferentially lost in enamelless or edentulous mammals.
Genes are sorted (largest to smallest) by the number of species without teeth or enamel that exhibit an inactivated gene (%intact < 80%) and, on a tie sorted (smallest to largest) by the number of species with tooth enamel that do not have an intact version of the gene (%intact < 90%).
GeneSymbol	Number of losses in enamelless or edentulous species	Number of losses in species with enamel	Species without enamel that lost the gene	Species with enamel that lost the gene	Number of enamel-loss species with data	Number of species with enamel and data	Number of enamel-loss species with intact gene	Number of species with enamel and intact gene	GLS P-value	GLS P-value, BH-corrected for multiple testing
ACP4	4	1	Balaenoptera_acutorostrata_scammoni;Manis_pentadactyla;Orycteropus_afer_afer;Dasypus_novemcinctus	Ursus_maritimus	4	47	0	45	4.11428e-16	1.82166e-12
AMTN	3	0	Manis_pentadactyla;Orycteropus_afer_afer;Dasypus_novemcinctus	NA	4	53	1	52	9.01881e-11	1.08906e-07
KRT72	3	1	Balaenoptera_acutorostrata_scammoni;Manis_pentadactyla;Dasypus_novemcinctus	Trichechus_manatus_latirostris	4	44	1	42	2.65731e-06	0.000339395
THRSP	3	3	Balaenoptera_acutorostrata_scammoni;Manis_pentadactyla;Dasypus_novemcinctus	Vicugna_pacos;Orcinus_orca;Bison_bison_bison	4	55	1	52	9.73135e-06	0.000873389
AMELY	3	3	Balaenoptera_acutorostrata_scammoni;Manis_pentadactyla;Orycteropus_afer_afer	Jaculus_jaculus;Bos_taurus;Pteropus_vampyrus	4	51	1	48	0.000195338	0.00658547
AC013412.1	3	3	Balaenoptera_acutorostrata_scammoni;Manis_pentadactyla;Orycteropus_afer_afer	Jaculus_jaculus;Bos_taurus;Pteropus_vampyrus	4	51	1	48	0.000307681	0.00959373
ODAM	3	3	Balaenoptera_acutorostrata_scammoni;Orycteropus_afer_afer;Dasypus_novemcinctus	Callithrix_jacchus;Orcinus_orca;Elephantulus_edwardii	3	53	0	49	0.00113286	0.0262614
REG3A	3	4	Balaenoptera_acutorostrata_scammoni;Orycteropus_afer_afer;Dasypus_novemcinctus	Spermophilus_tridecemlineatus;Nannospalax_galili;Orcinus_orca;Odobenus_rosmarus_divergens	4	47	1	43	0.00013632	0.00493388
UCP1	3	5	Balaenoptera_acutorostrata_scammoni;Manis_pentadactyla;Dasypus_novemcinctus	Tursiops_truncatus;Orcinus_orca;Equus_caballus;Loxodonta_africana;Trichechus_manatus_latirostris	4	54	1	49	4.84345e-05	0.00236203
RP11-192H23.4	3	5	Balaenoptera_acutorostrata_scammoni;Manis_pentadactyla;Dasypus_novemcinctus	Nannospalax_galili;Tursiops_truncatus;Orcinus_orca;Erinaceus_europaeus;Condylura_cristata	4	57	1	52	8.22918e-05	0.00337371
OPN1SW	3	3	Balaenoptera_acutorostrata_scammoni;Manis_pentadactyla;Dasypus_novemcinctus	Otolemur_garnettii;Leptonychotes_weddellii;Chrysochloris_asiatica	4	55	1	50	0.000221646	0.00730553
PKD2L1	3	5	Balaenoptera_acutorostrata_scammoni;Manis_pentadactyla;Orycteropus_afer_afer	Heterocephalus_glaber;Tursiops_truncatus;Orcinus_orca;Chrysochloris_asiatica;Echinops_telfairi	4	51	1	46	0.00323833	0.0610138
MMP20	2	0	Balaenoptera_acutorostrata_scammoni;Orycteropus_afer_afer	NA	3	52	1	52	2.98882e-15	9.92511e-12
ZADH2	2	0	Orycteropus_afer_afer;Dasypus_novemcinctus	NA	3	54	1	54	3.1583e-14	6.99194e-11
ATP6AP2	2	0	Balaenoptera_acutorostrata_scammoni;Dasypus_novemcinctus	NA	3	52	1	52	2.75917e-10	2.81923e-07
FUCA2	2	0	Balaenoptera_acutorostrata_scammoni;Dasypus_novemcinctus	NA	3	52	1	52	2.46492e-09	1.30966e-06
C4orf26	2	0	Balaenoptera_acutorostrata_scammoni;Manis_pentadactyla	NA	4	56	2	56	4.28808e-11	5.69586e-08
EBAG9	2	0	Balaenoptera_acutorostrata_scammoni;Manis_pentadactyla	NA	4	55	2	55	1.56247e-09	9.88298e-07
GSTO1	2	0	Manis_pentadactyla;Dasypus_novemcinctus	NA	4	55	2	55	4.55302e-09	2.10739e-06
MMP19	2	0	Manis_pentadactyla;Orycteropus_afer_afer	NA	4	53	2	53	5.07689e-09	2.10739e-06
